# Supplementary material for: A thieno[3,4-b]thiophene linker enables a low-bandgap fluorene-cored molecular acceptor for efficient non-fullerene solar cells
Source: Royal Society of Chemistry journal article supplement (doi:10.1039/c7qm00585g), 2018-01-01

Electronic Supplementary Information for:

**Thieno[3,4-*b*]thiophene linker enables a low-bandgap fluorene-cored molecular acceptor for efficient non-fullerene solar cells**

Haijun Fan,<sup>a</sup> Thomas Vergote,<sup>a</sup> Shengjie Xu,<sup>a</sup> Shanshan Chen,<sup>c</sup> Changduk Yang<sup>c</sup> and Xiaozhang Zhu<sup>\*ab</sup>

<sup>a</sup>Beijing National Laboratory for Molecular Sciences, CAS Key Laboratory of Organic Solids, Institute of Chemistry, Chinese Academy of Sciences, Beijing 100190, China

<sup>b</sup>University of Chinese Academy of Sciences, Beijing 100049, China

<sup>c</sup>Department of Energy Engineering, School of Energy and Chemical Engineering, Low Dimensional Carbon Materials Center, Ulsan National Institute of Science and technology (UNIST), Ulsan 689-798, South Korea

\*Author to whom correspondence should be addressed. E-mail: xzzhu@iccas.ac.cn.

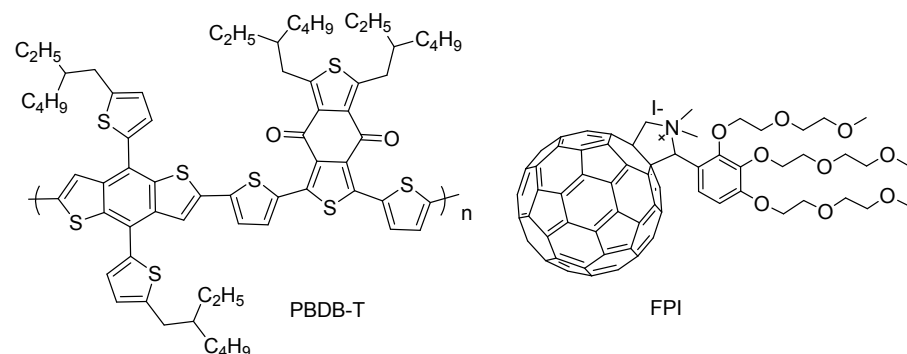

**Fig. S1** Molecular structure of PBDB-T and FPI.

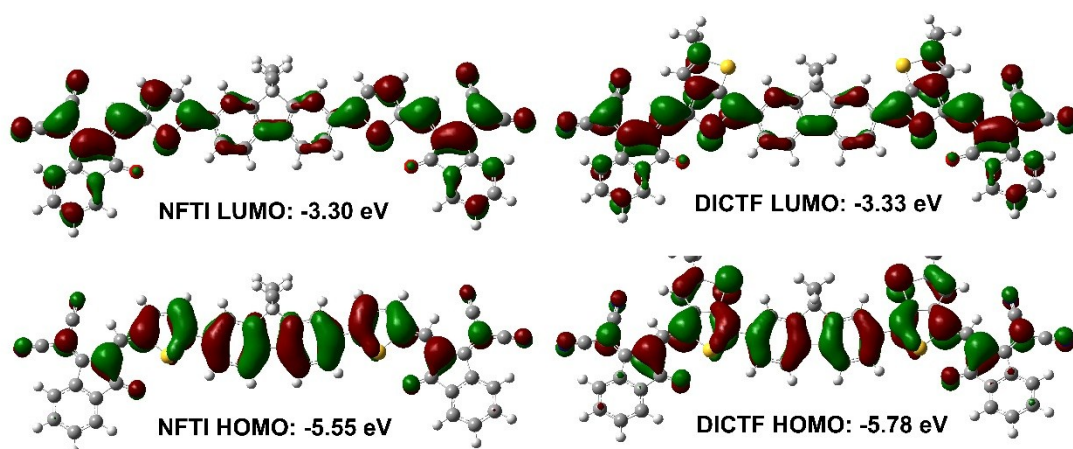

**Fig. S2** Theoretical calculation on energy levels of NFTI and DICTF.

**Table S1** Photovoltaic parameters of solar cells based on PBDB-T:NFTI films of different blending ratios, measured under illumination of AM 1.5 G, 100 mW cm<sup>-2</sup>.

| D:A<br>(w/w) | $V_{oc}$ (V) | $J_{sc}$ (mA cm <sup>-2</sup> ) | FF   | PCE (%) <sup>a)</sup> |
|--------------|--------------|---------------------------------|------|-----------------------|
| 1:0.5        | 0.934        | 7.78                            | 0.52 | 3.82(3.59)            |
| 1:0.9        | 0.923        | 8.93                            | 0.57 | 4.75(4.48)            |
| 1:1.3        | 0.923        | 8.39                            | 0.60 | 4.66(4.45)            |
| 1:1.7        | 0.921        | 7.48                            | 0.61 | 4.19(4.04)            |

a) bracketed is the averaged PCE value statistically collected from 24 devices.

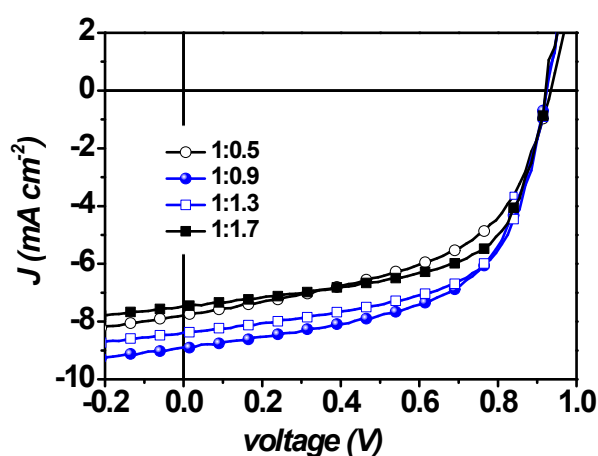

**Fig. S3**  $J$ - $V$  curves of solar cells based on PBDB-T:NFTI films of different blending ratios

**Table S2** Photovoltaic parameters of solar cells based on PBDB-T:NFTI films of different amount of DPE additive, measured under illumination of AM 1.5 G, 100 mW cm<sup>-2</sup>.

| DPE(v/v%) | $V_{oc}$ (V) | $J_{sc}$ (mA cm <sup>-2</sup> ) | FF   | PCE (%) <sup>a)</sup> |
|-----------|--------------|---------------------------------|------|-----------------------|
| 0.5       | 0.914        | 9.51                            | 0.56 | 4.95(4.74)            |
| 1         | 0.909        | 10.45                           | 0.57 | 5.46(5.29)            |
| 2         | 0.895        | 10.51                           | 0.57 | 5.46(5.31)            |
| 3         | 0.887        | 10.93                           | 0.58 | 5.66(5.46)            |
| 5         | 0.904        | 9.83                            | 0.61 | 5.44(5.29)            |

a) bracketed is the averaged PCE value statistically collected from 24 devices.

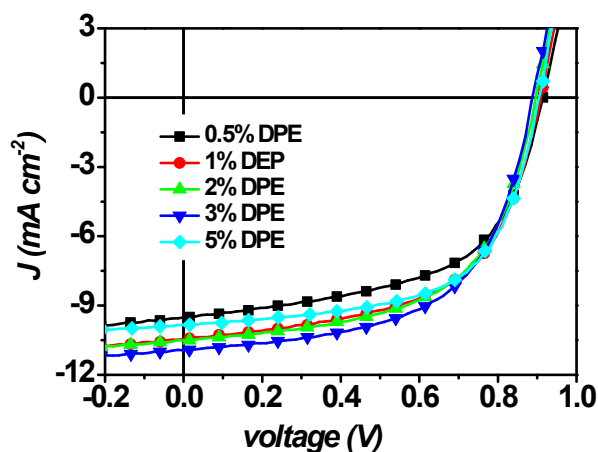

**Fig. S4**  $J$ - $V$  curves of solar cells based on PBDB-T:NFTI films of different DPE contents.

**Table S3** Photovoltaic parameters of solar cells based on PBDB-T:NFTI films under different thermal annealing temperature, measured under illumination of AM 1.5 G,  $100 \text{ mW cm}^{-2}$ .

| TA temperature | $V_{oc}$ (V) | $J_{sc}$ ( $\text{mA cm}^{-2}$ ) | FF   | PCE (%) <sup>a)</sup> |
|----------------|--------------|----------------------------------|------|-----------------------|
| No             | 0.904        | 9.83                             | 0.61 | 5.44(5.28)            |
| 60 °C          | 0.900        | 10.35                            | 0.58 | 5.44(5.30)            |
| 80 °C          | 0.892        | 9.97                             | 0.65 | 5.79(5.62)            |
| 100 °C         | 0.894        | 11.47                            | 0.60 | 6.23(6.08)            |
| 120 °C         | 0.902        | 11.54                            | 0.61 | 6.33(6.10)            |
| 140 °C         | 0.888        | 11.67                            | 0.60 | 6.20(6.01)            |

<sup>a)</sup> bracketed is the averaged PCE value statistically collected from 24 devices.

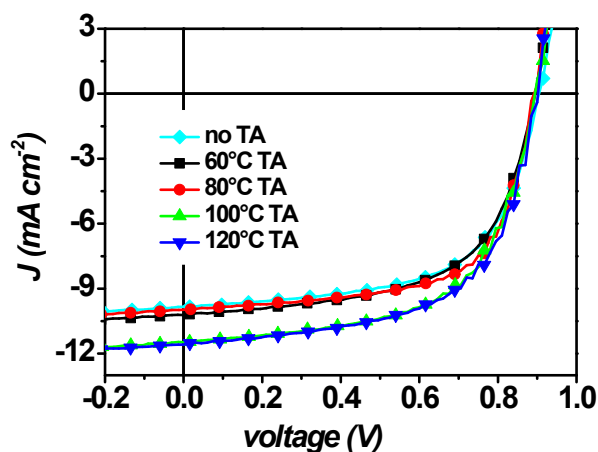

**Fig. S5**  $J$ - $V$  curves of solar cells based on PBDB-T:NFTI films under different

thermal annealing temperature.

**Table S4** Photovoltaic parameters of solar cells based on PBDB-T:NFTI films processed in different solvents, measured under illumination of AM 1.5 G, 100 mW cm<sup>-2</sup>.

| solvent | $V_{oc}$ (V) | $J_{sc}$ (mA cm <sup>-2</sup> ) | FF   | PCE (%) <sup>a)</sup> |
|---------|--------------|---------------------------------|------|-----------------------|
| DCB     | 0.902        | 11.54                           | 0.61 | 6.33(6.10)            |
| CB      | 0.909        | 13.60                           | 0.60 | 7.42(7.25)            |
| CF      | 0.887        | 15.32                           | 0.54 | 7.41(7.23)            |

<sup>a)</sup> bracketed is the averaged PCE value statistically collected from 24 devices.

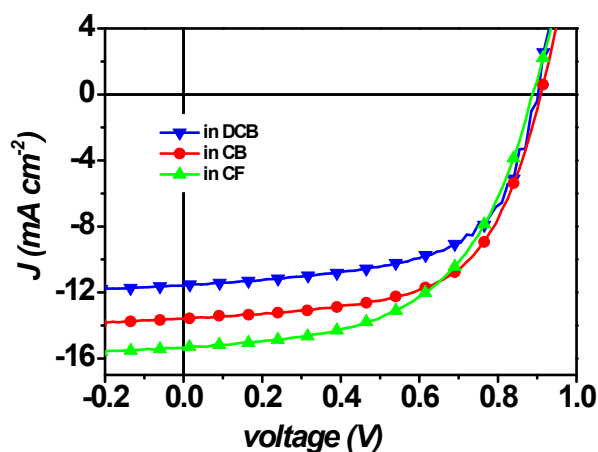

**Fig. S6**  $J$ - $V$  curves of solar cells based on PBDB-T:NFTI films processed in different solvents.

**Table S5** Photovoltaic parameters of solar cells based on PBDB-T:NFTI films processed in use of DPE and F4-TCNQ binary additives, measured under illumination of AM 1.5 G, 100 mW cm<sup>-2</sup>.

| F4-TCNQ content(w/w%) | $V_{oc}$ (V) | $J_{sc}$ (mA cm <sup>-2</sup> ) | FF         | PCE (%) <sup>a)</sup> |
|-----------------------|--------------|---------------------------------|------------|-----------------------|
| without               | 0.898(0.896) | 16.22(16.18)                    | 0.57(0.56) | 8.34(8.14)            |
| 0.005                 | 0.896(0.895) | 17.49(17.40)                    | 0.55(0.54) | 8.69(8.37)            |
| 0.01                  | 0.902(0.901) | 17.82(17.77)                    | 0.56(0.55) | 9.02(8.89)            |
| 0.05                  | 0.883(0.880) | 17.77(17.65)                    | 0.54(0.53) | 8.50(8.24)            |

<sup>a)</sup> bracketed is the averaged PCE value statistically collected from 24 devices. All devices adopt FPI electron transporting layers.

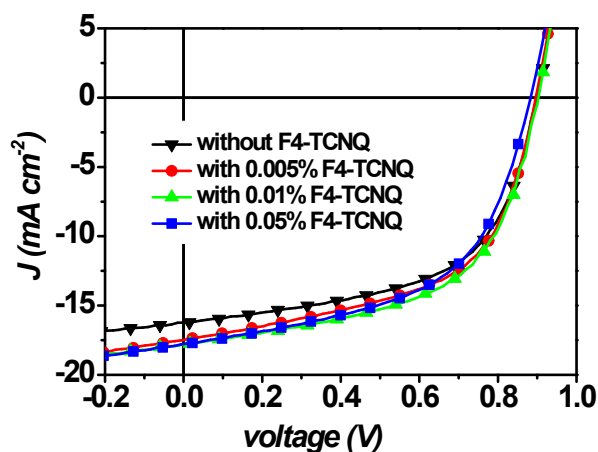

**Fig. S7**  $J$ - $V$  curves of solar cells based on PBDB-T:NFTI films processed in use of different amount of F4-TCNQ.

**Table S6** Comparison on photovoltaic parameters of NFTI-based solar cells with different active areas, measured under AM 1.5G, 100 mW cm<sup>-2</sup> simulated solar illumination.

| F4-TCNQ content(w/w%) | $V_{oc}$ (V) | $J_{sc}$ (mA cm <sup>-2</sup> ) | FF         | PCE (%)                 |
|-----------------------|--------------|---------------------------------|------------|-------------------------|
| without               | 0.898(0.896) | 16.22(16.18)                    | 0.57(0.56) | 8.34(8.14) <sup>a</sup> |
|                       | 0.878(0.878) | 15.29(15.28)                    | 0.59(0.58) | 8.02(7.89) <sup>b</sup> |
| 0.01                  | 0.902(0.901) | 17.82(17.77)                    | 0.56(0.55) | 9.02(8.89) <sup>a</sup> |
|                       | 0.883(0.880) | 16.81(16.56)                    | 0.59(0.59) | 8.75(8.61) <sup>b</sup> |

a) device active area: 3.08 mm<sup>2</sup>. b) device active area: 9.24 mm<sup>2</sup>.

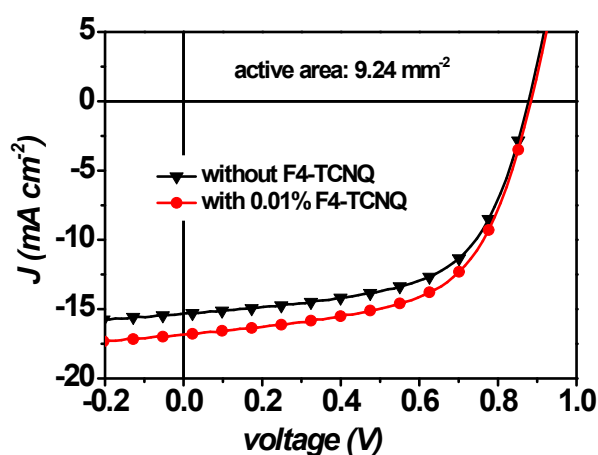

**Fig. S8**  $J$ - $V$  curves of solar cells based on PBDB-T:NFTI films with active area of 9.24 mm<sup>2</sup>.

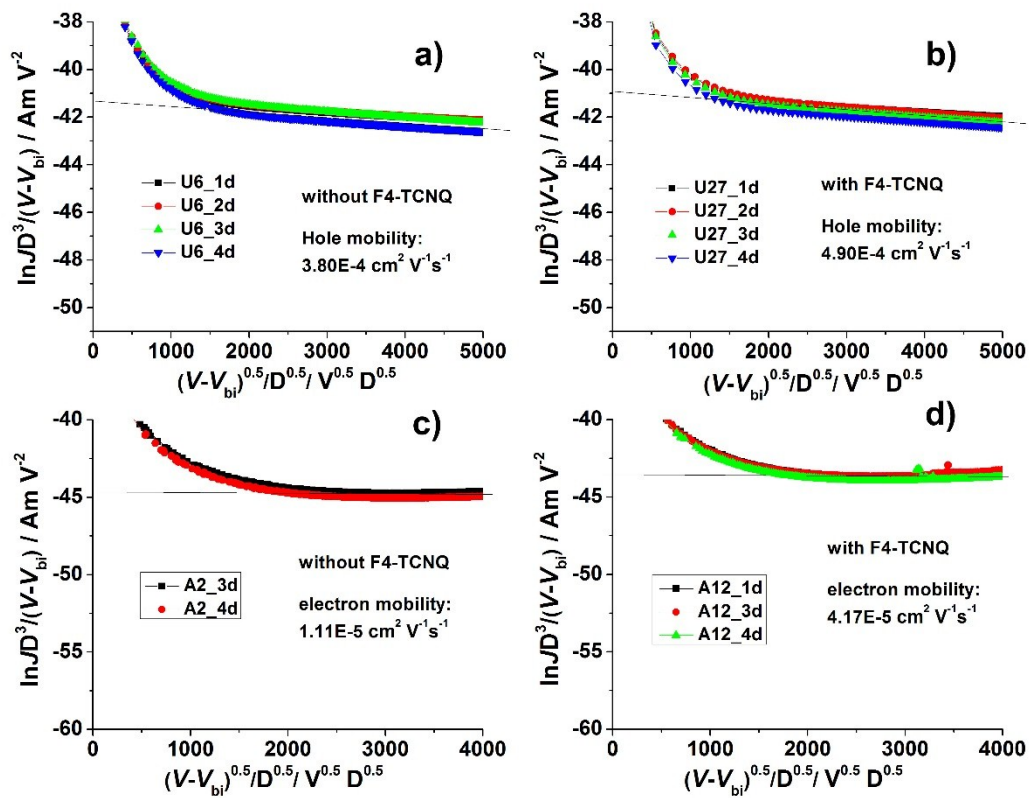

**Fig. S9** Hole and electron mobility of PBDB-T:NFTI device by SCLC method.

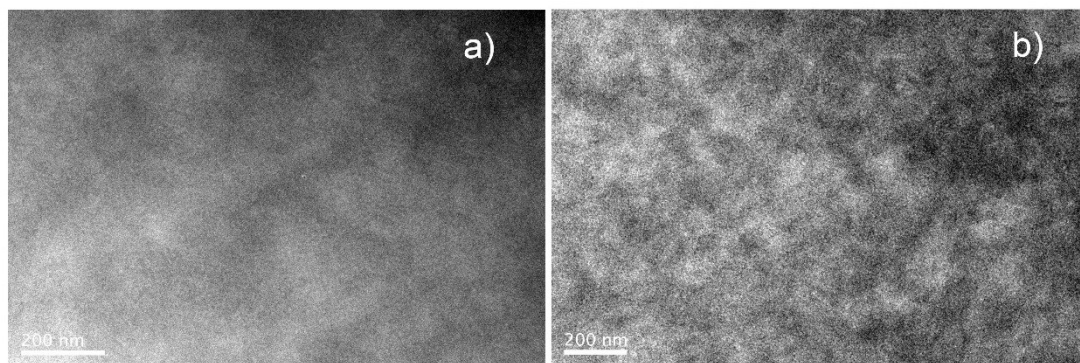

**Fig. S10** TEM images for PBDB-T:NFTI film (a) processed without or (b) with F4-TCNQ additives.

## NMR Charts

### 6,6'-(9,9-Dioctyl-9H-fluorene-2,7-diyl)bis(2-octylthieno[3,4-b]thiophene-4-carbaldehyde) (3)

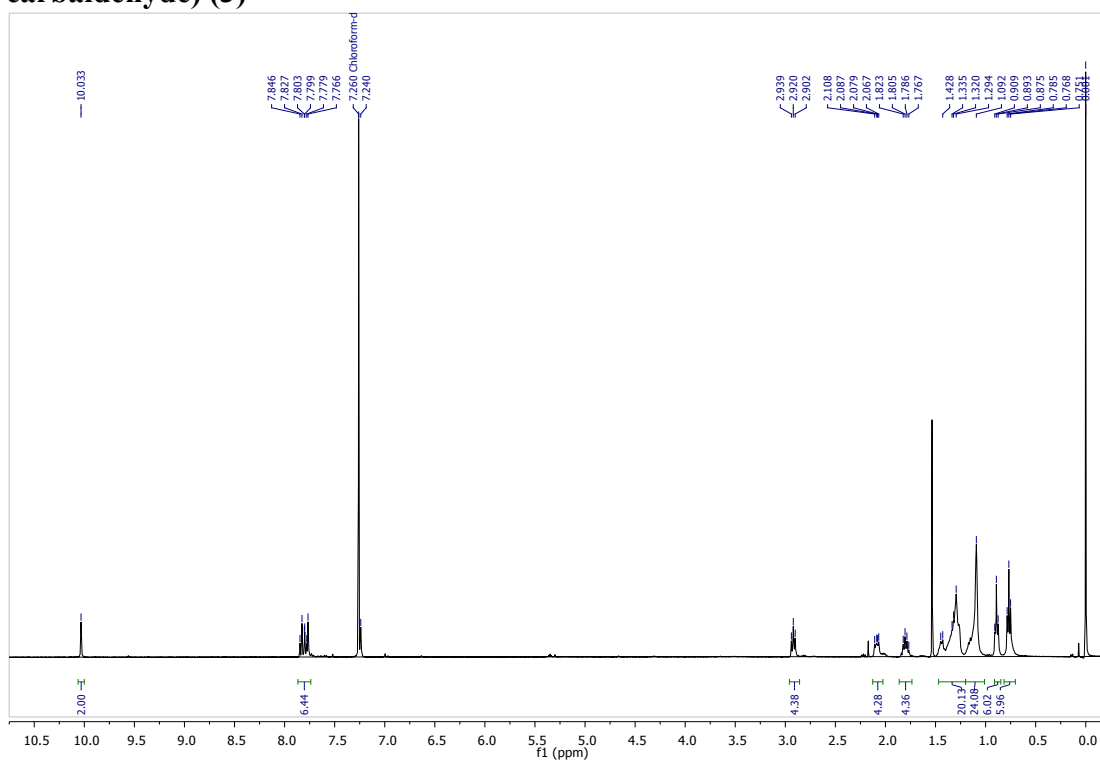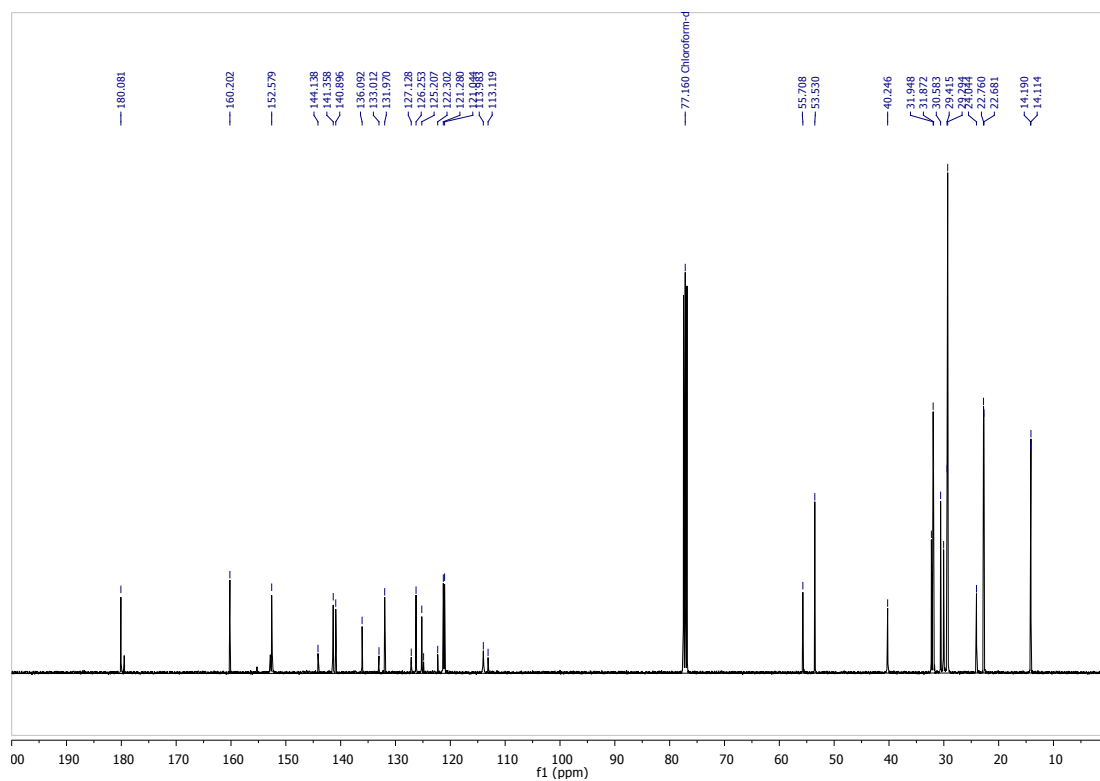

**2,2'-((((9,9-Dioctyl-9H-fluorene-2,7-diyl)bis(2-octylthieno[3,4-b]thiophene-6,4-diyl))bis(methylene))bis(3-oxo-2,3-dihydro-1H-indene-2-yl-1-ylidene)) dimalononitrile (NFTI):**

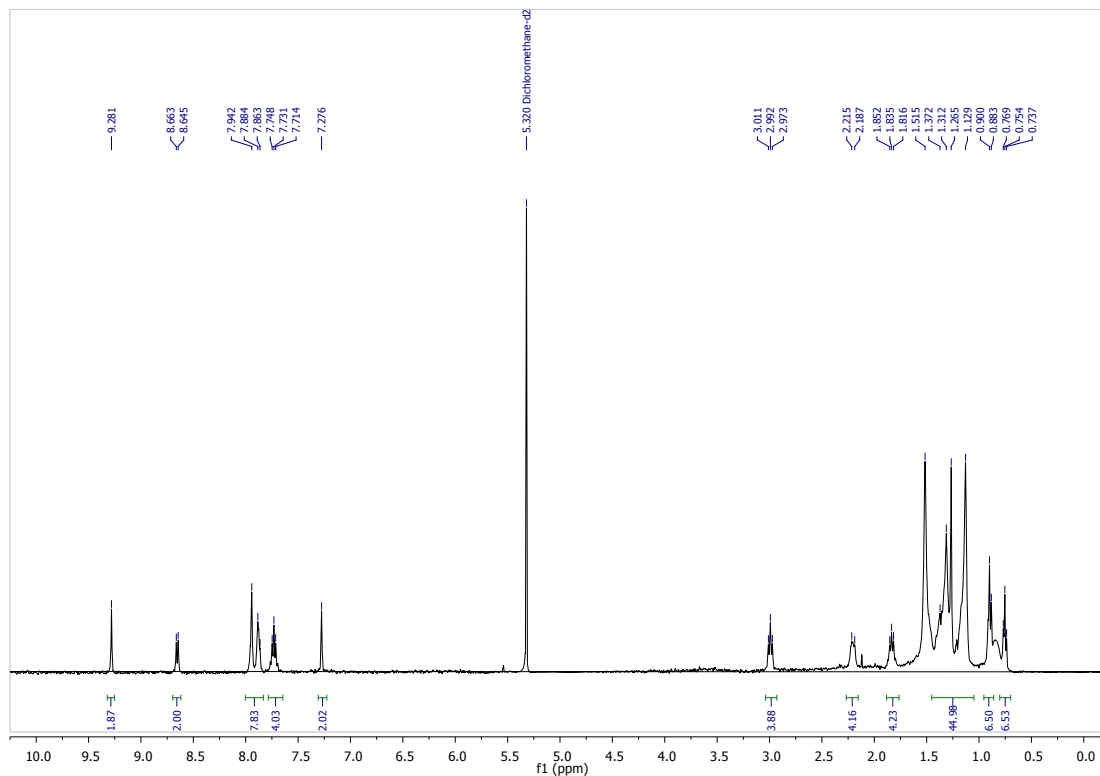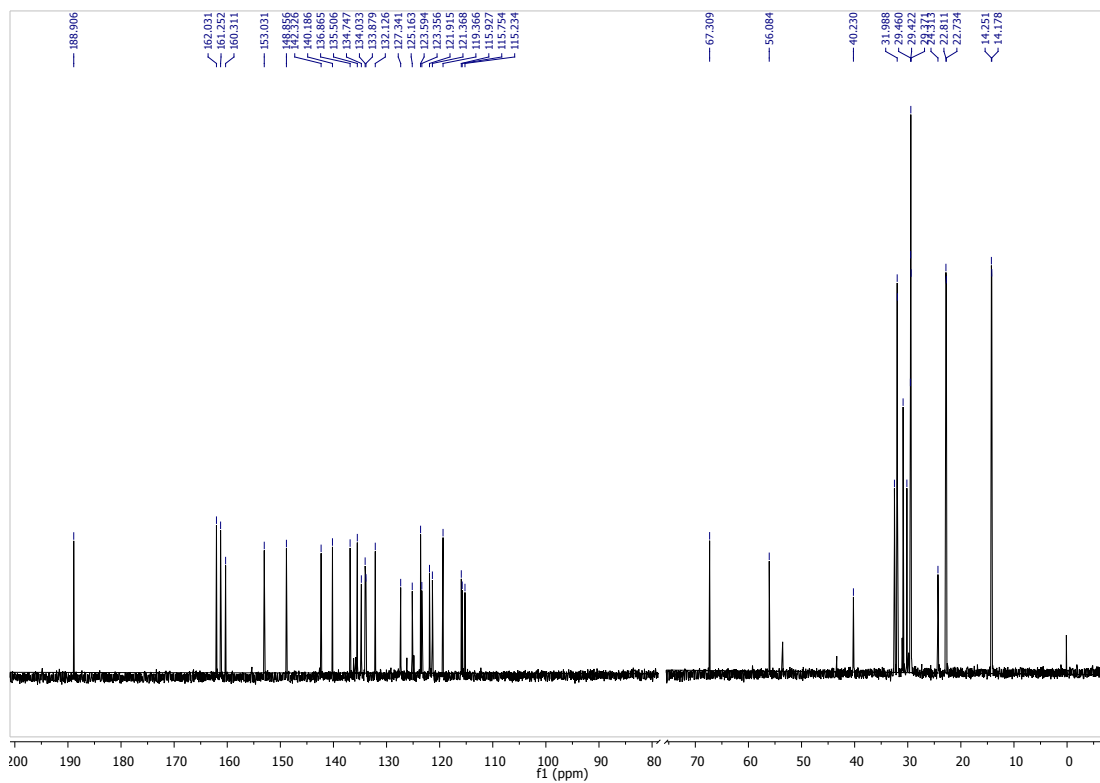



## MALDI-TOF Mass Spectrum

6,6'-((9,9-Dioctyl-9H-fluorene-2,7-diyl)bis(2-octylthieno[3,4-b]thiophene-4-carbaldehyde) (3)

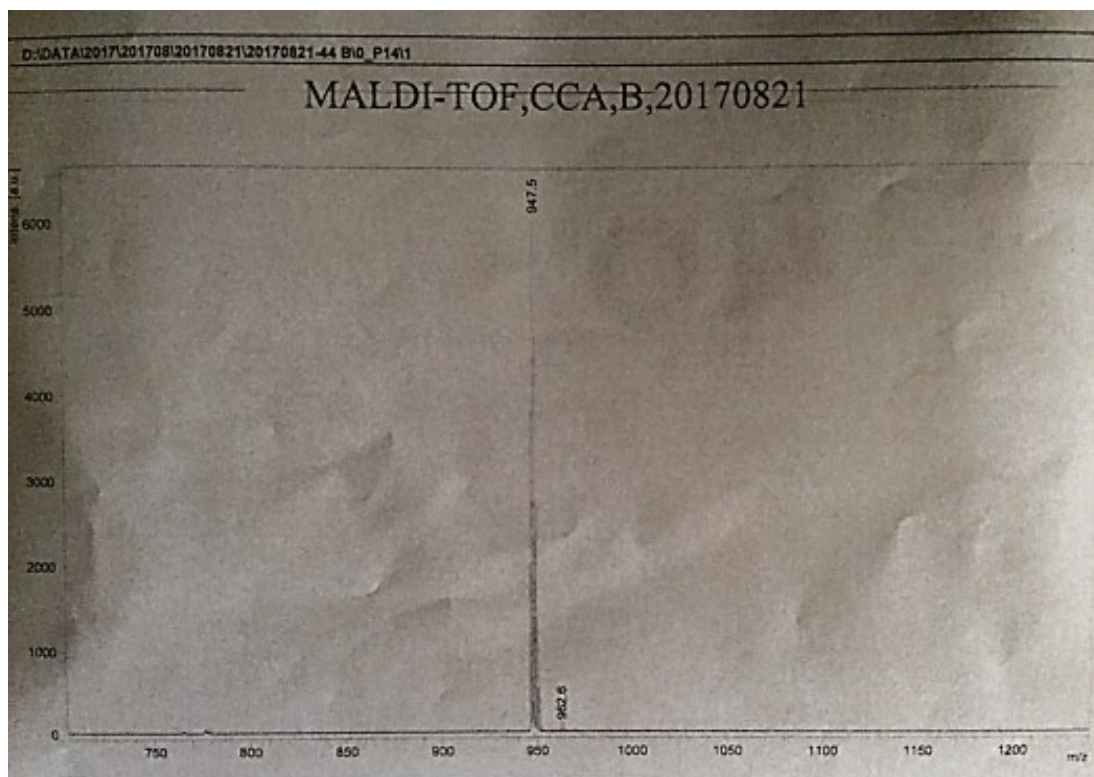

2,2'-((((9,9-Dioctyl-9H-fluorene-2,7-diyl)bis(2-octylthieno[3,4-b]thiophene-6,4-diyl))bis(methylene))bis(3-oxo-2,3-dihydro-1H-indene-2-yl-1-ylidene))dimalononitrile (NFTI).

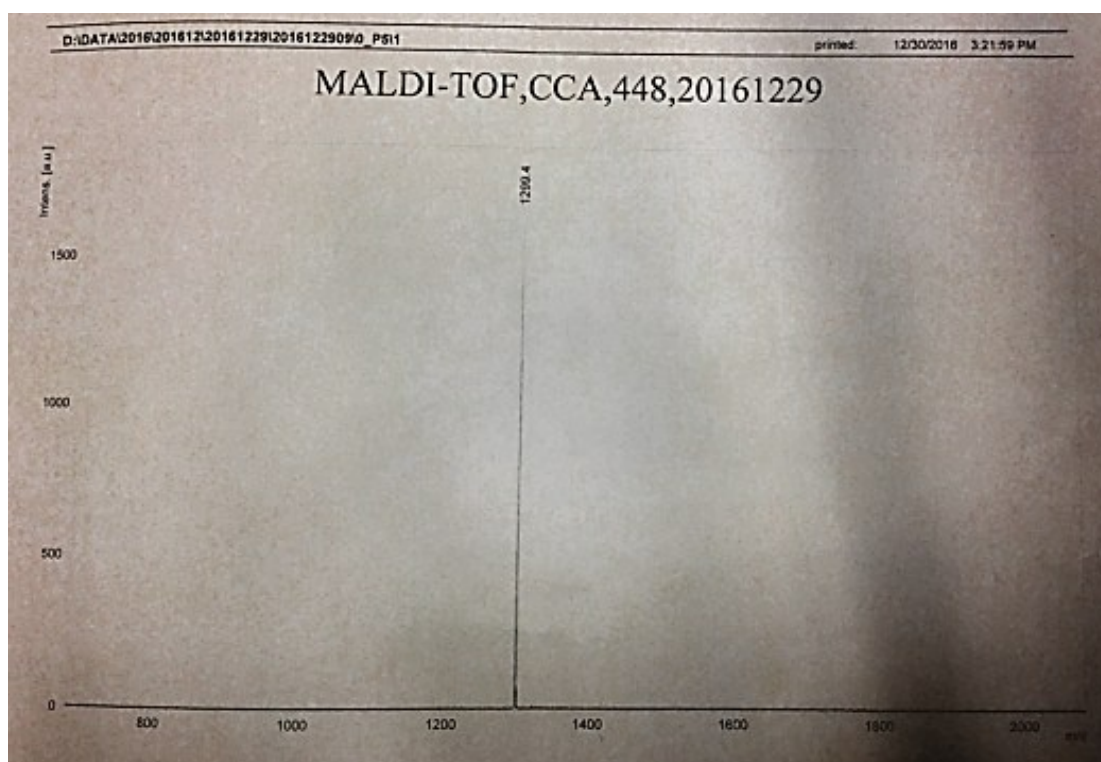

Supplement: c7qm00585g1.pdf [file c7qm00585g1.pdf]
